# Supplementary material for: Web-Based Digital Health Interventions for Weight Loss and Lifestyle Habit Changes in Overweight and Obese Adults: Systematic Review and Meta-Analysis
Source: PubMed Central journal article supplement (PMC6330028; doi:10.2196/jmir.9609), 2019-01-08
Supplement: jmir_v21i1e298_app1.pdf [file jmir_v21i1e298_app1.pdf]

**Multimedia Appendix 1.** Individual study characteristics.

| Study                       | BMI range (kg/m <sup>2</sup> ) | Mean age | Female gender (%) | Number of participants in the intervention/control groups | Primary outcome (s) | Secondary outcome (s)                                                                          | Follow-up (months) | Drop-out rate (%) in the intervention/control group | Setting                       |
|-----------------------------|--------------------------------|----------|-------------------|-----------------------------------------------------------|---------------------|------------------------------------------------------------------------------------------------|--------------------|-----------------------------------------------------|-------------------------------|
| Allen et al, 2013 [12]      | 28-42                          | 45       | 60                | 17/18*                                                    | Weight              |                                                                                                | 6                  | 41;33                                               | Physician referral            |
| Chung et al 2014 [12, 13]   | 28-?                           | 37       | 63                | 20/20*                                                    | Weight              | BMI, fat percentage, waist-to-hip ratio, mean arterial pressure                                | 3                  | 5;20                                                | University students and staff |
| Collins et al 2012 [14]     | 25-40                          | 42       | 58                | 99/104*                                                   | BMI                 | Waist, Blood pressure, heart rate, lipids, glucose, insulin, dietary intake, physical activity | 3                  | 25;8                                                | Community                     |
| Dunn et al 2016 [15]        | ≥25                            | 48       | 86                | 42/38                                                     | Weight, BMI         | Confidence in ability of being physically active and eating healthily                          | 4                  | 33;47                                               | State employees               |
| Hurkman s et al 2018 [16]   | 29-34                          | 45       | 77                | 24/21                                                     | BMI                 | Cardio-metabolic risk factors, Dietary patterns, Physical activity                             | 3                  | 25;20                                               | Community                     |
| Kraschne wski 2011 [17]     | 27-40                          | 50       | 69                | 50/50                                                     | Weight              | BMI, Blood Pressure, Quality of Life, total caloric intake                                     | 3                  | 10;14                                               | Academic medical center       |
| Krukows ki et al, 2011 [18] | 25-50                          | 46       | 93                | 161/158                                                   | Weight              |                                                                                                | 6                  | 0.1;2                                               | Clinical center               |
| McConno n et al 2007 [19]   | ≥30                            | 46       | 77                | 111/110                                                   | Weight, BMI         |                                                                                                | 12                 | 51;30                                               | General practice              |
| Padwal et                   | ≥35                            | 40       | 83                | 225/215                                                   | Weight,             | Blood                                                                                          | 9                  | 26;32                                               | Clinical                      |

|                     |                                                                |    |    |       |        |                                                                                    |    |       |                    |
|---------------------|----------------------------------------------------------------|----|----|-------|--------|------------------------------------------------------------------------------------|----|-------|--------------------|
| al 2017 [20]        |                                                                |    |    |       | BMI    | pressure, Lipids, HbA1c, Quality of life, Readiness to change, Self-efficacy, Mood |    |       | center             |
| Steinberg 2013 [21] | 25-40                                                          | 45 | 80 | 47/44 | Weight | Diet and physical activity behaviors, perceptions of daily self-weighting          | 6  | 4;4   | University setting |
| Yardley 2014 [22]   | ≥30 or ≥28 with hypertension, hypercholesterolemia or diabetes | 51 | 66 | 45/43 | weight | Waist, height, fat mass, blood pressure, fasting lipids, blood glucose and HbA1c   | 12 | 30;33 | General practice   |
